# Supplementary material for: Refphase: Multi-sample phasing reveals haplotype-specific copy number heterogeneity
Source: PubMed Central journal article supplement (PMC10621967; doi:10.1371/journal.pcbi.1011379), 2023-10-23
Supplement: pcbi.1011379.s004.pdf [file pcbi.1011379.s004.pdf]

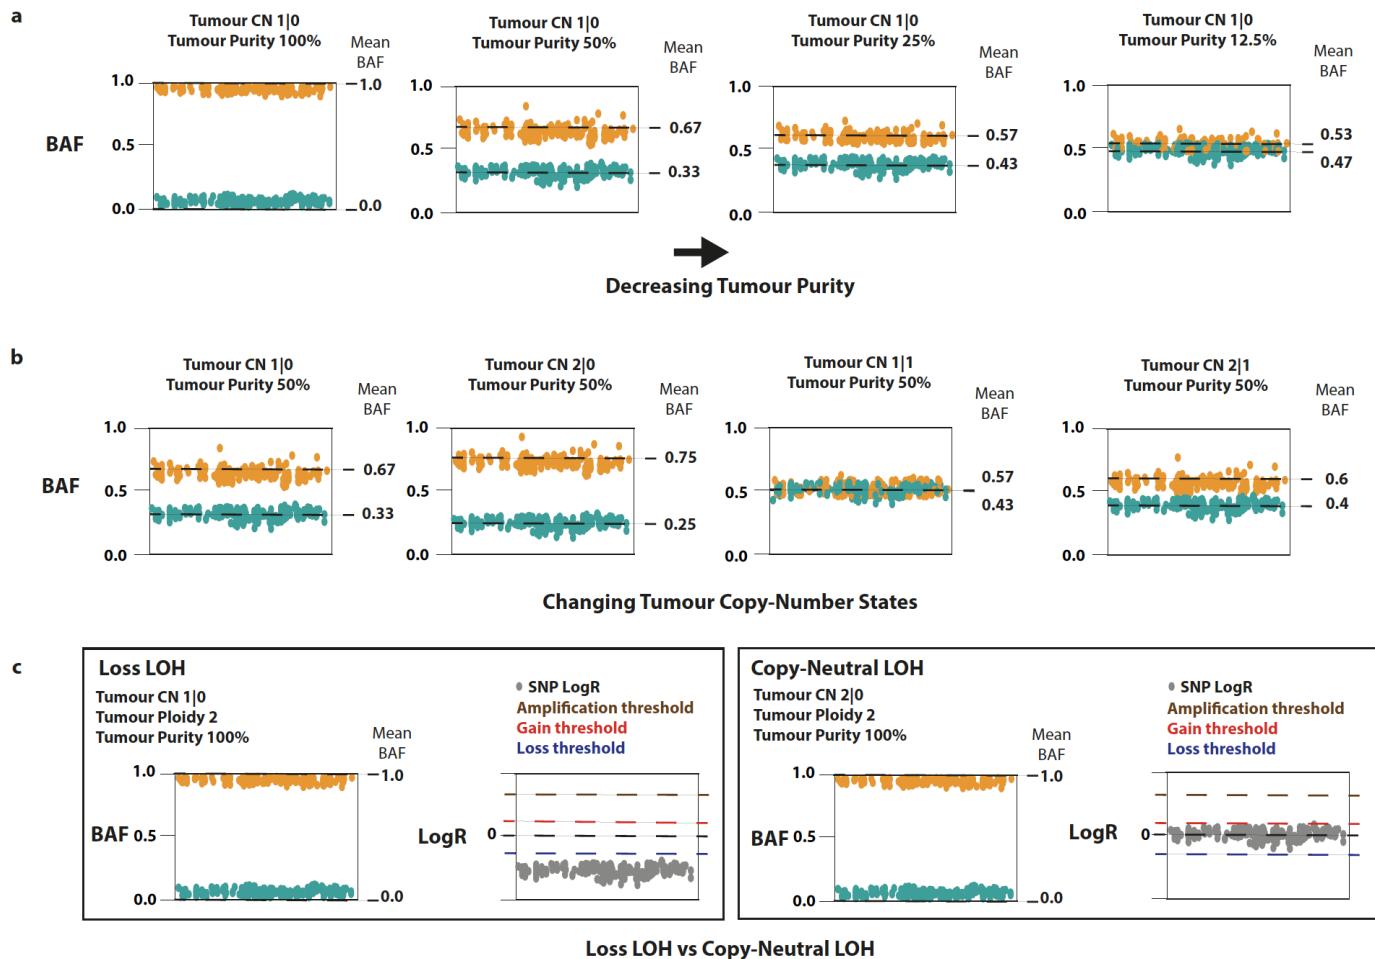

**Supplementary Figure 4: The effects of tumour purity and copy number states on B-Allele Frequency (BAF) and log read-depth ratio (LogR) profiles.** **a)** An example of the effect of decreasing tumour purity on BAF band separation. **b)** The effect of varying copy number states on BAF band separation for a tumour of fixed purity, here 50%. **c)** Example of typical BAF and LogR profiles for a loss of heterozygosity (LOH) with total copy number loss (left) and copy-neutral LOH (CNLOH) (right). Relative-to-ploidy thresholds are indicated by dashed lines and are derived for a diploid 100% pure tumour using the formulae described in the Methods of this manuscript. Orange and blue points throughout plots represent the phased “A” haplotype and “B” haplotype respectively.
