# Supplementary material for: Refphase: Multi-sample phasing reveals haplotype-specific copy number heterogeneity
Source: PubMed Central journal article supplement (PMC10621967; doi:10.1371/journal.pcbi.1011379), 2023-10-23
Supplement: pcbi.1011379.s009.pdf [file pcbi.1011379.s009.pdf]

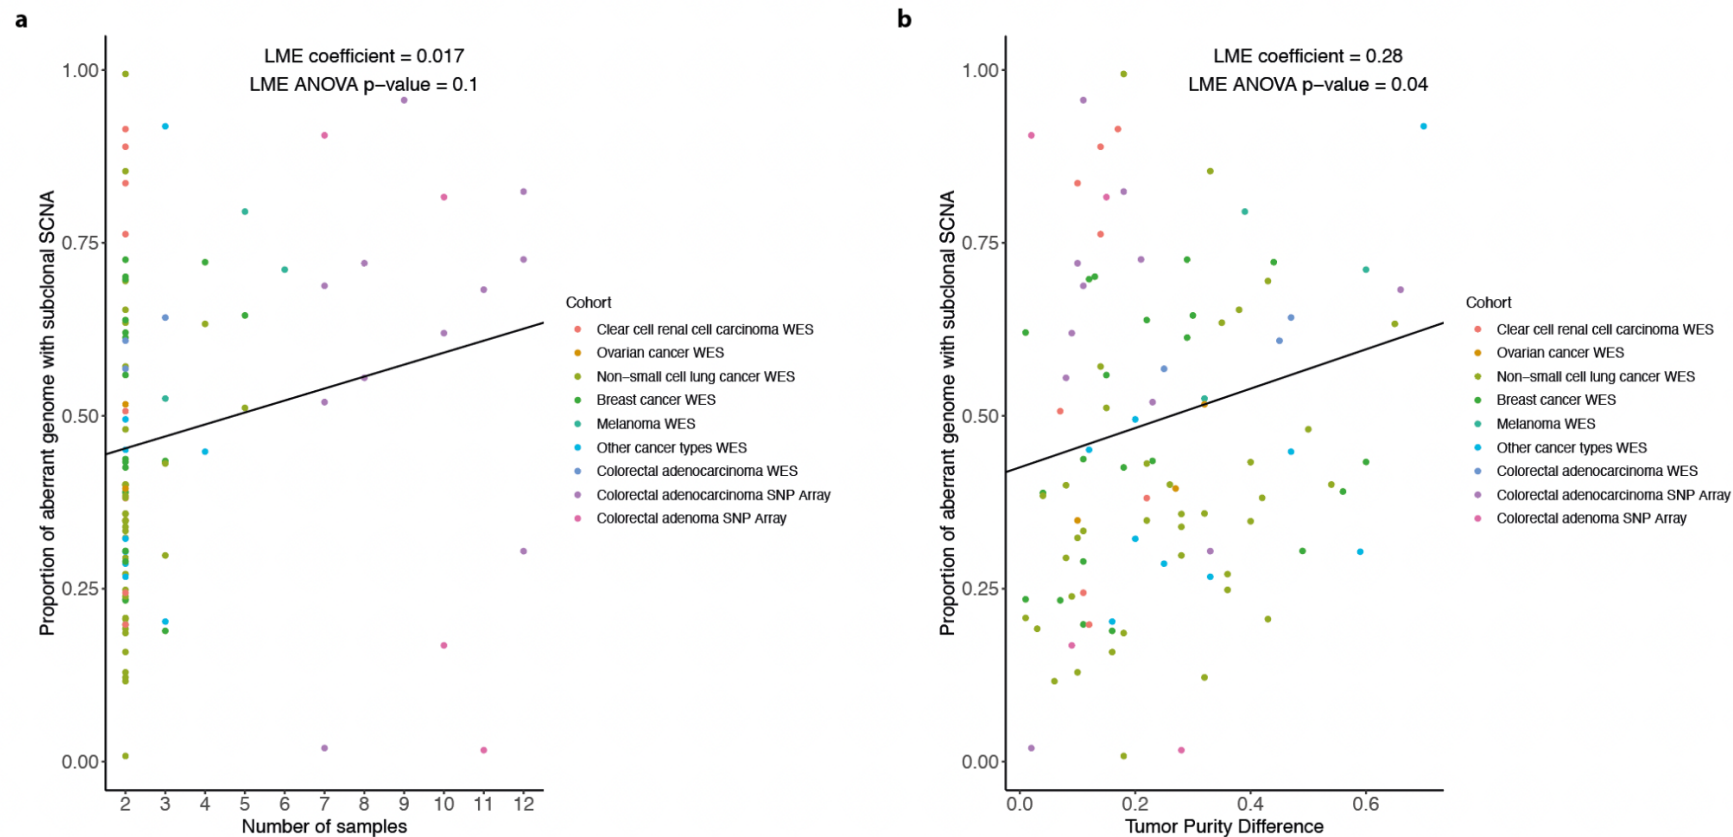

**Supplementary Figure 9: The relationship between SCNA intra-tumour heterogeneity and clinical variables.** Association between proportion of aberrant genome with **a**) number of samples (LME coefficient = 0.017, LME ANOVA  $p=0.1$ ), and **b**) tumour purity difference - defined as the purity difference between the most and least pure sample within a tumour (LME coefficient = 0.28, LME ANOVA  $p=0.04$ ). Proportion of aberrant genome is defined as the proportion of the total length of genomic segments harbouring any relative-to-ploidy SCNA (gain or loss) or loss of heterozygosity (LOH) event which contains a subclonal SCNA or LOH event. Proportion of the aberrant genome is defined at the tumour level. Analyses are carried out for the pan-cancer cohort described in Figures 4 and 5 ( $n=99$  tumours). Linear mixed effect (LME) ANOVA  $p$ -values and LME coefficients calculated using the nlme R package are shown, with analyses adjusted for study cohort (defined by histology and sequencing platform), indicated by the colour legend. Whole-exome sequencing (WES) data is taken from the Brastianos *et al.* study [1]; SNP array data is taken from the Sottoriva *et al.* study [2]. Best fit lines shown have LME slope and intercept values.

#### References:

1. Brastianos PK, Carter SL, Santagata S, Cahill DP, Taylor-Weiner A, Jones RT, et al. Genomic Characterization of Brain Metastases Reveals Branched Evolution and Potential Therapeutic Targets. *Cancer Discov.* 2015;5: 1164–1177.
2. Sottoriva A, Kang H, Ma Z, Graham TA, Salomon MP, Zhao J, et al. A Big Bang model of human colorectal tumor growth. *Nat Genet.* 2015;47: 209–216.
