# Supplementary material for: Refphase: Multi-sample phasing reveals haplotype-specific copy number heterogeneity
Source: PubMed Central journal article supplement (PMC10621967; doi:10.1371/journal.pcbi.1011379), 2023-10-23
Supplement: pcbi.1011379.s010.pdf [file pcbi.1011379.s010.pdf]

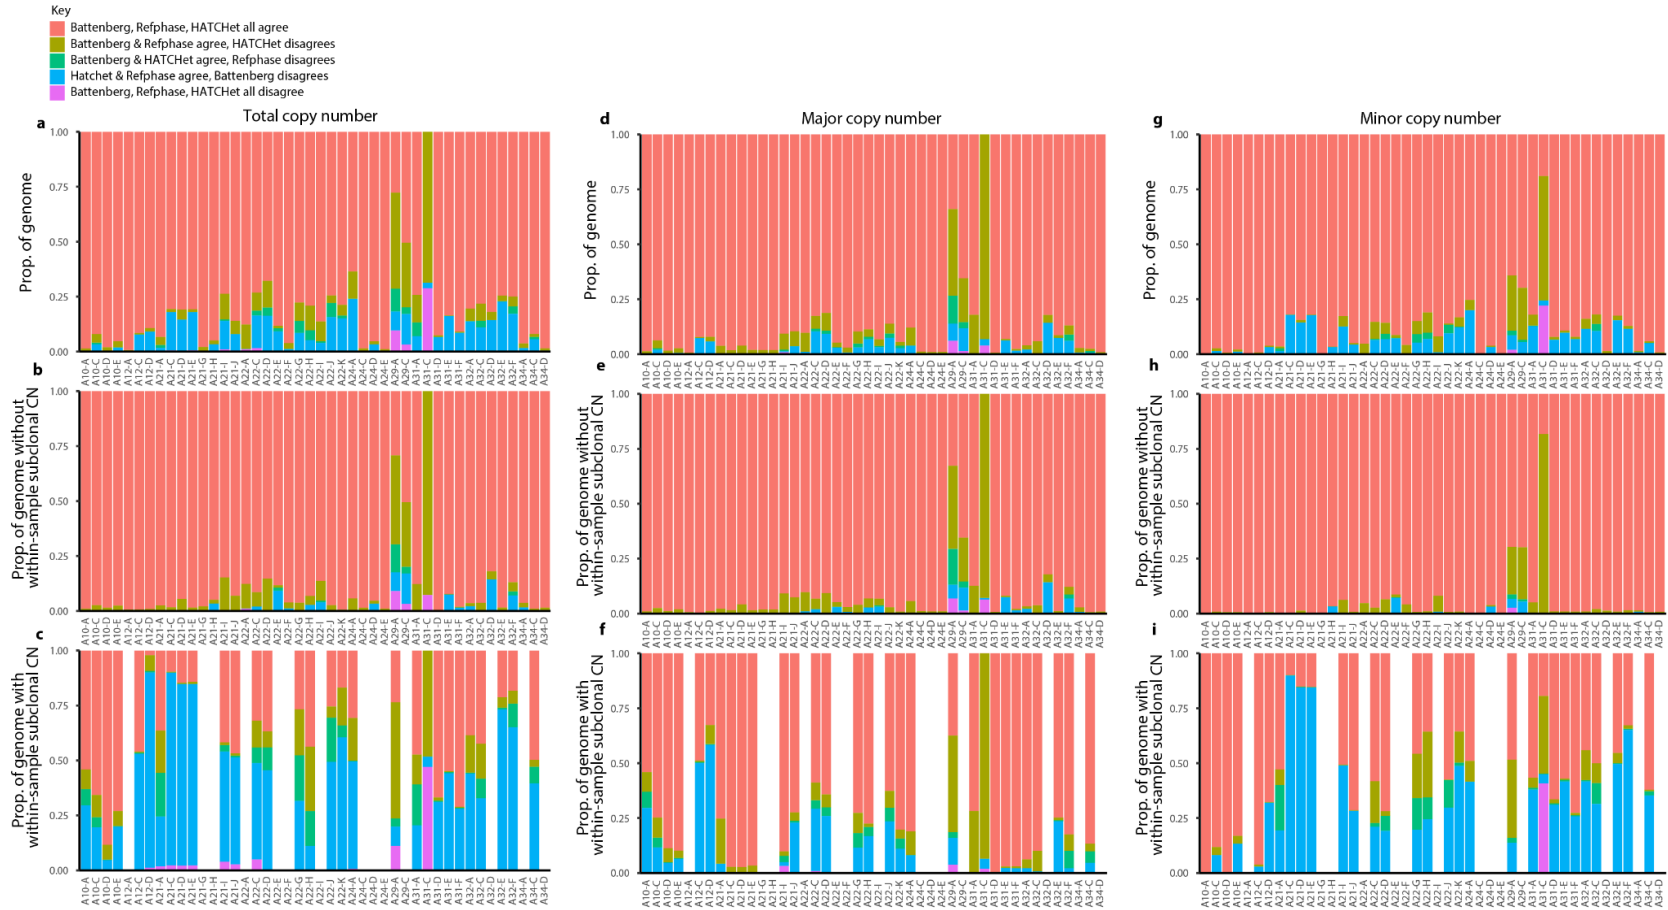

**Supplementary Figure 10: Refphase, Battenberg, and HATCHet comparisons.** Barcharts for each sample in the Gundem et al. WGS cohort showing concordance and discordance between Refphase derived integer copy number and dominant subclone number from Battenberg and HATCHet showing: **a)** total copy number across all segments **b)** total copy number across all segments without within-sample subclonal copy number called by both Battenberg and HATCHet **c)** total copy number across all segments that demonstrate within-sample subclonal copy number called by both Battenberg and HATCHet. **d)** Major copy number across all segments **e)** Major copy number across all segments without within-sample subclonal copy number called by both Battenberg and HATCHet **f)** Major copy number across all segments that demonstrate within-sample subclonal copy number called by both Battenberg and HATCHet. **g)** Minor copy number across all segments **h)** Minor copy number across all segments without within-sample subclonal copy number called by both Battenberg and HATCHet **i)** Minor copy number across all segments that demonstrate within-sample subclonal copy number called by both Battenberg and HATCHet.
